# Supplementary material for: Ontogeny and taxonomy of the hadrosaur (Dinosauria, Ornithopoda) remains from Basturs Poble bonebed (late early Maastrichtian, Tremp Syncline, Spain)
Source: PLOS journal article supplement (doi:10.1371/journal.pone.0206287), 2018-10-31
Supplement: S2 (10.1371/journal.pone.0206287.s002) [file journal.pone.0206287.s002]

## S2 Text.

### Thin sections - Procedure

The cut surface was exposed using a Buehler Isomet low speed saw, and later polished on a glass sheet coated with carborundum powder, using decreasing particle size (e.g. 600, 800 and 1000 grit). The bone was fixed to a frosted glass slide using ultraviolet curing glue (Loctite 358). The ground section was prepared with a diamond saw (Buehler, PetroThin) to a final thickness of about 100–120  $\mu\text{m}$ . The thin section was polished with a gradient of carborundum (800 and 1200 grit). The slice was dehydrated through a graded series of alcohol baths, cleared in Histo-Clear II during five minutes and finally mounted in DPX mounting medium. In the case of the large tibia MCD-5109 and femur MCD-5011, cores were extracted using an electric power drill mounted in a small-workshop press. After extraction, cores were embedded in epoxy resin before sectioning, using the same methodology explained above.

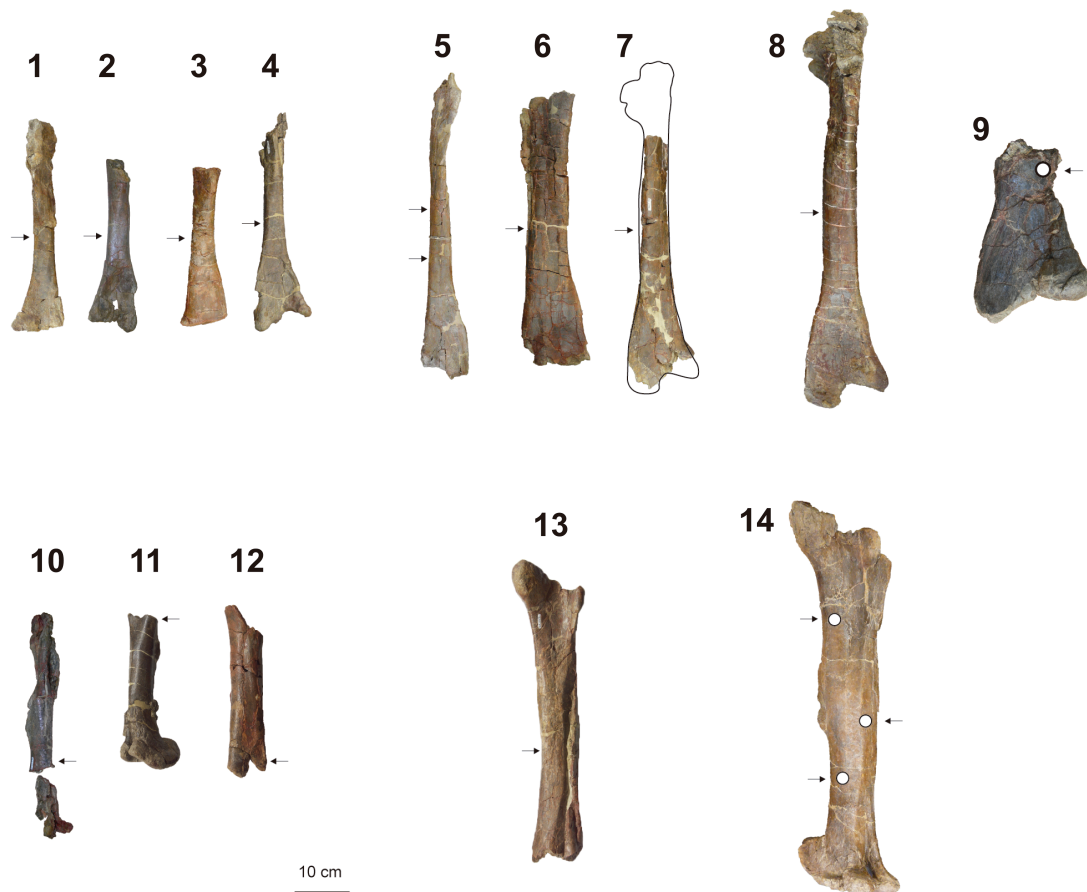

**S2 Figure A.** Tibiae and femora sampled for histological study. Black arrows indicate the location of each section, while white circles indicate the position of the cores.

Tibiae: (1) MCD-7144 (left). (2) MCD-4986 (left). (3) MCD-4886 (left). (4) MCD-4784 (right). (5) MCD-4719 (left). (6) MCD-4920 (right). (7) MCD-4918 (right). (8) MCD-4728 (right). (9) MCD-5109 (right). Femora: (10) MCD-4802 (left). (11) MCD-4708 (right). (12) MCD-5104 (right). (13) MCD-4723 (left). (14) MCD-5011 (left).

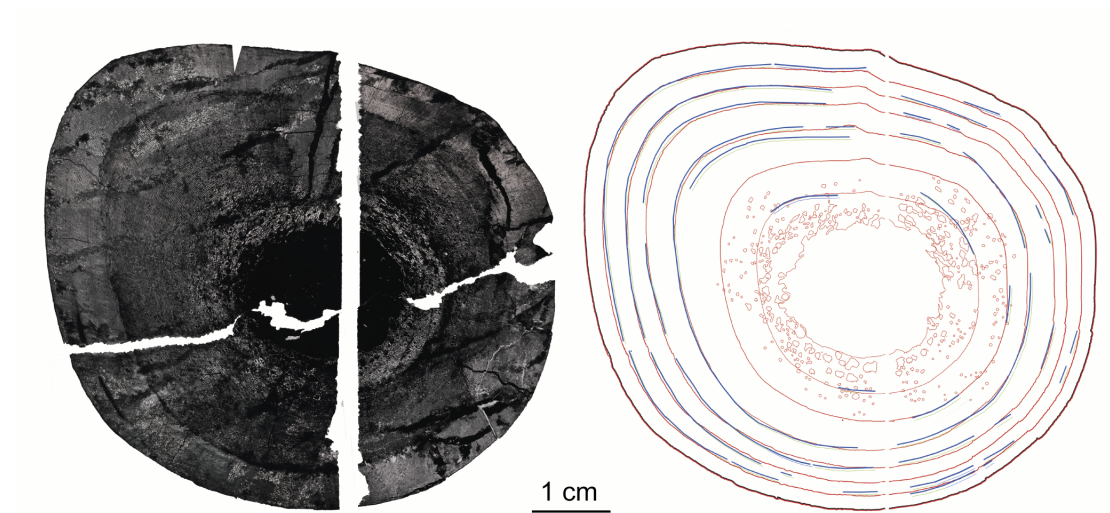

**S2 Figure B.** Main elements observed in the thin section of tibia MCD-4728. Left, photograph of the section under polarized light; right, schematic view. Blue: LAGs that were identified under polarized light. Red: LAGs that were reconstructed using the external perimeter of the bone.

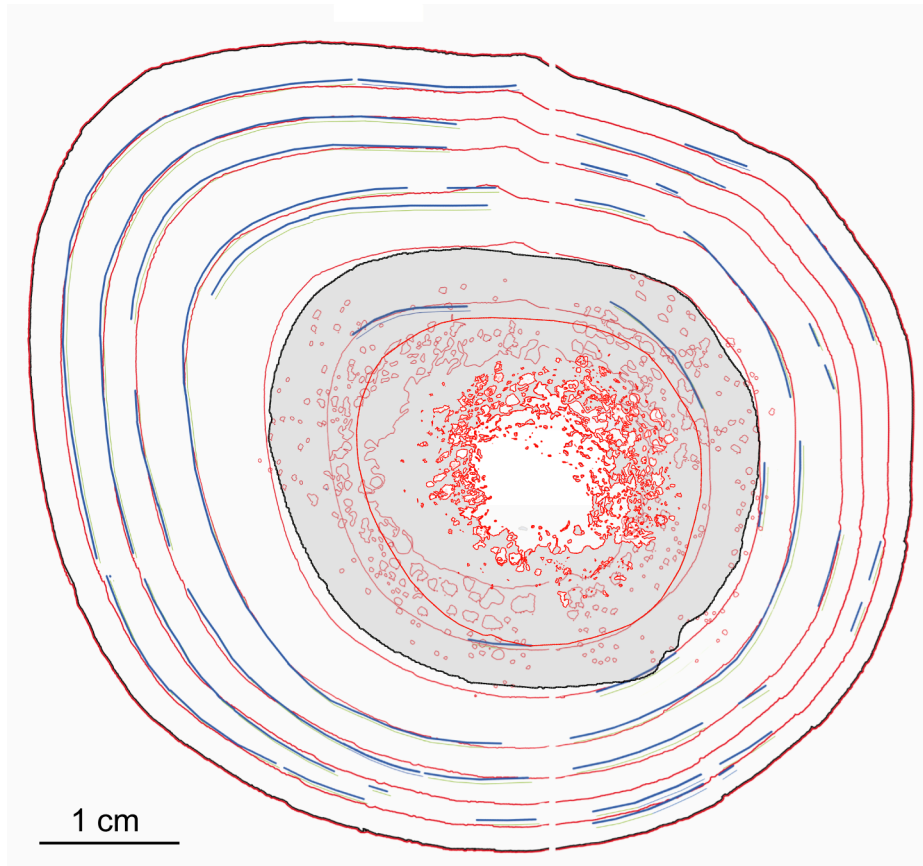

**S2 Figure C.** Overlapping between tibia sketch MCD-4728 (white) and the flipped (from left to right side) tibia sketch MCD-7144 (grey). Note the similitudes in the reconstructed first growth cycle of MCD-4728 and the first growth cycle of MCD-7144. In addition, it is interesting to see the coincidence between the second growth cycle of MCD-4728 and the periosteal surface of MCD-7144, suggesting that this last individual died just before the development of its second rest mark (see Text).

**S2 Table 1.** Measurements of the annual LAG circumference in BP tibiae. Reference for perinate tibiae is Cooper et al. [18]. Measurements are in millimetres.

| <b>Specimen</b> | <b>Location within the cortex</b> | <b>Circumference</b> |
|-----------------|-----------------------------------|----------------------|
| MCD-4986        | Perinate tibia (age 0)            | 25                   |
|                 | LAG 1                             | 79                   |
|                 | Periosteal surface                | 106                  |
| MCD-7144        | Perinate tibia (age 0)            | 25                   |
|                 | LAG 1                             | 77                   |
|                 | Periosteal surface                | 109                  |
| MCD-4784        | Perinate tibia (age 0)            | 25                   |
|                 | LAG 1                             | 90                   |
|                 | Periosteal surface                | 112                  |
| MCD-4886        | Perinate tibia (age 0)            | 25                   |
|                 | LAG 1                             | 75                   |
|                 | LAG 2                             | 103                  |
|                 | LAG 3/Periosteal surface          | 128                  |
| MCD-4728        | Perinate tibia (age 0)            | 25                   |
|                 | LAG 1                             | 88                   |
|                 | LAG 2                             | 113                  |
|                 | LAG 3                             | 139                  |
|                 | LAG 4                             | 159                  |
|                 | LAG 5                             | 172                  |
|                 | LAG 6                             | 186                  |
|                 | Periosteal surface                | 201                  |
| MCD-4719        | Perinate tibia (age 0)            | 25                   |
|                 | LAG 1                             | Not recorded         |
|                 | LAG 2                             | Not recorded         |
|                 | LAG 3                             | 132                  |
|                 | LAG 4                             | 141                  |
|                 | LAG 5                             | 148                  |
|                 | LAG 6                             | 151                  |
|                 | LAG 7                             | 153                  |
|                 | LAG 8                             | 155                  |
|                 | Periosteal surface                | 157                  |
| MCD-4920        | Perinate tibia (age 0)            | 25                   |
|                 | LAG 1                             | Not recorded         |
|                 | LAG 2                             | Not recorded         |
|                 | LAG 3                             | 138                  |
|                 | LAG 4                             | 149                  |
|                 | LAG 5                             | 157                  |
|                 | LAG 6                             | 167                  |
|                 | LAG 7                             | 174                  |
|                 | LAG 8 (beginning of EFS)          | 179                  |

|          |                                 |              |
|----------|---------------------------------|--------------|
|          | Periosteal surface (end of EFS) | 184          |
| MCD-4918 | Perinate tibia (age 0)          | 25           |
|          | LAG 1                           | Not recorded |
|          | LAG 2                           | 112          |
|          | LAG 3                           | 131          |
|          | LAG 4                           | 144          |
|          | LAG 5                           | 156          |
|          | LAG 6                           | 162          |
|          | LAG 7                           | 167          |
|          | LAG 8 (beginning of EFS)        | 172          |
|          | Periosteal surface (end of EFS) | 175          |
